# Supplementary material for: Performance of mesoporous silicas (MCM-41 and SBA-15) and carbon (CMK-3) in the removal of gas-phase naphthalene: adsorption capacity, rate and regenerability
Source: Royal Society of Chemistry journal article supplement (doi:10.1039/c5ra27289k), 2016-01-01
Supplement: c5ra27289k1.pdf [file c5ra27289k1.pdf]

## Supporting Information

### **Performance of mesoporous silicas (MCM-41 and SBA-15) and carbon (CMK-3) in removal of gas-phase naphthalene: adsorption capacity, rate and regenerability**

Yingshu Liu<sup>a</sup>, Ziyi Li<sup>a,\*</sup>, Xiong Yang<sup>a</sup>, Yi Xing<sup>b,\*\*</sup>, Chuenjinn Tsai<sup>c</sup>, Quan Yang<sup>a</sup>, Zhanying Wang<sup>a</sup>, Ralph T. Yang<sup>d</sup>

*<sup>a</sup>School of Mechanical Engineering, University of Science and Technology Beijing, Beijing, 100083, China*

*<sup>b</sup>School of Civil and Environmental Engineering, University of Science and Technology Beijing, Beijing, 100083, China*

*<sup>c</sup>Institute of Environmental Engineering, National Chiao Tung University, University Road, Hsinchu, 30010, Taiwan*

*<sup>d</sup>Department of Chemical Engineering, University of Michigan, Ann Arbor, Michigan 48109-2136, United States*

\*Corresponding author

(T) +86-10-62332751; (F) +86-10-62334210. Email: masterlazy@163.com.

\*\*Co-corresponding author:

(T) +86-10-62332206; (F) +86-10-62347649. E-mail address: xing\_bkd@163.com.

NO. OF PAGE: 7

NO. OF FIGURES: 2

NO. OF TABLES: 4

## S1. Experimental conditions and parameters

The experimental conditions and main parameters are summarized in Table S1 of the Supporting Information.

**Table S1.** Experimental conditions and main parameters for the adsorption tests.

| Parameters                                                                             | Experimental conditions |        |       |
|----------------------------------------------------------------------------------------|-------------------------|--------|-------|
| $T$ , bed temperature (K)                                                              | 398.2                   |        |       |
| $H$ , packed length of adsorbents (mm)                                                 | 100                     |        |       |
| $d_b$ , bed diameter (mm)                                                              | 3.0                     |        |       |
| $u_0$ , gas superficial velocity ( $\text{m}\cdot\text{s}^{-1}$ )                      | 0.024                   |        |       |
| $\mu$ , gas dynamic viscosity ( $\text{Pa}\cdot\text{s}$ )                             | $2.42\times 10^{-5}$    |        |       |
|                                                                                        | MCM-41                  | SBA-15 | CMK-3 |
| $\rho_s$ , solid density ( $\text{kg}\cdot\text{m}^{-3}$ )                             | 2181                    | 2075   | 2790  |
| $\rho_a$ , apparent density ( $\text{kg}\cdot\text{m}^{-3}$ )                          | 730.7                   | 670.3  | 440.8 |
| $\rho$ , bed density ( $\text{kg}\cdot\text{m}^{-3}$ )                                 | 67.76                   | 79.35  | 24.66 |
| $\varepsilon$ , bed porosity                                                           | 0.907                   | 0.882  | 0.944 |
| $d_s$ , adsorbent size (mm)                                                            | 0.32                    | 0.24   | 0.12  |
| $a$ , mass-transfer area per unit volume of the bed ( $\text{m}^2\cdot\text{m}^{-3}$ ) | 1854                    | 3550   | 3354  |

## S2. Calibration of flame ionization detector FID measurement

The naphthalene concentrations generated at different saturator temperatures were directly measured by the previous calibrated FID. The calibration procedure is described as follows. A tiny amount of solid naphthalene was weighted and placed in the saturator,  $M$  (mg). Then, the temperature of the saturator was increased up to the selected temperature for vapor generation and kept until all the solid was evaporated. In this way, a trapezoid-like curve was obtained with FID, and then the total area under the curve,  $A$  (mV·min), can be calculated by the integration method. The area corresponding to 1  $\mu\text{g}$  of evaporated naphthalene, defined as the calibration parameter,  $F$  (mV·min· $\mu\text{g}^{-1}$ ), was determined to be by averaging the results of five runs as shown in Table S2. Once the FID signal,  $S$  (mV), for the vapor naphthalene generated at certain temperature was measured, the feed concentration,  $C_0$  (mol·m<sup>-3</sup>), can be calculated by the equation of  $C_0 = S/Q/F/128.18$ , with the known  $Q$  of 10 ml/min. The FID-determined result for the concentration at the selected generation temperatures in the adsorption text are listed in Table S3.

**Table S2.** Determinations of FID calibration parameter in five runs.

|                              | 1     | 2     | 3     | 4     | 5     | average | RSD (%) |
|------------------------------|-------|-------|-------|-------|-------|---------|---------|
| $M$ (mg)                     | 2.96  | 2.64  | 2.71  | 3.17  | 2.83  | —       | —       |
| $A$ (mV·min)                 | 86846 | 68957 | 74471 | 95163 | 78787 | —       | —       |
| $F$ (mV·min/ $\mu\text{g}$ ) | 29.34 | 26.12 | 27.84 | 30.02 | 27.48 | 28.16   | 4.92    |

**Table S3.** Determinations of the naphthalene concentration at selected generation temperatures.

| Temperature (°C) | FID signal (mV) |         |         |         | $C_0$ (mol·m <sup>-3</sup> ) | RSD (%) |
|------------------|-----------------|---------|---------|---------|------------------------------|---------|
|                  | 1               | 2       | 3       | average |                              |         |
| -10              | 4.97            | 5.33    | 5.18    | 5.16    | $1.43 \times 10^{-4}$        | 2.86    |
| 0                | 13.36           | 11.85   | 12.83   | 12.68   | $3.52 \times 10^{-4}$        | 4.93    |
| 10               | 33.56           | 34.67   | 34.4    | 34.21   | $9.49 \times 10^{-4}$        | 1.38    |
| 15               | 57.89           | 61.45   | 60.72   | 60.02   | $1.66 \times 10^{-3}$        | 2.56    |
| 20               | 96.34           | 101.22  | 101.33  | 99.63   | $2.76 \times 10^{-3}$        | 2.34    |
| 25               | 155.67          | 161.78  | 163.48  | 160.31  | $4.44 \times 10^{-3}$        | 2.09    |
| 30               | 270.43          | 278.2   | 275.23  | 274.62  | $7.61 \times 10^{-3}$        | 1.17    |
| 40               | 668.78          | 689.34  | 666.82  | 674.98  | $1.87 \times 10^{-2}$        | 1.51    |
| 50               | 1653.24         | 1703.45 | 1667.83 | 1674.84 | $4.64 \times 10^{-2}$        | 1.26    |

### S3. Sensitivity analysis for mass-transfer parameters on the breakthrough curve

A sensitivity analysis was performed to study the effects of mass-transfer parameters on the breakthrough curve. The sensitivity to  $k_f$  and  $k_p$  on the example case of naphthalene on SBA-15 at feed concentration of  $0.352 \times 10^{-3} \text{ mol/m}^3$  are shown in Figs. S1 and S2, respectively. The values of both  $k_f$  and  $k_p$  were varied from 0.5 to 2 times of the base values while other parameters were kept unchanged. It shows that the breakthrough curve is very sensitive to the internal mass transfer, while increasing or decreasing the value of  $k_f$  within the tested range has little effect on the breakthrough curve. This implies that the overall mass transfer for naphthalene adsorption is controlled by internal mass transfer, suggesting the more important internal mass transfer resistance compared to the external mass transfer resistance.

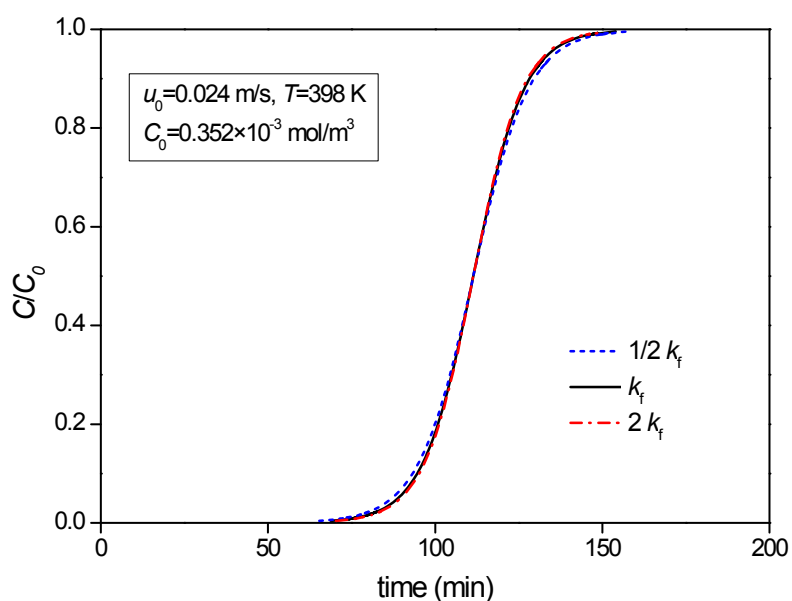

**Fig. S1.** Sensitivity of predicted breakthrough curves to  $k_f$  for naphthalene in SBA-15 packed beds.

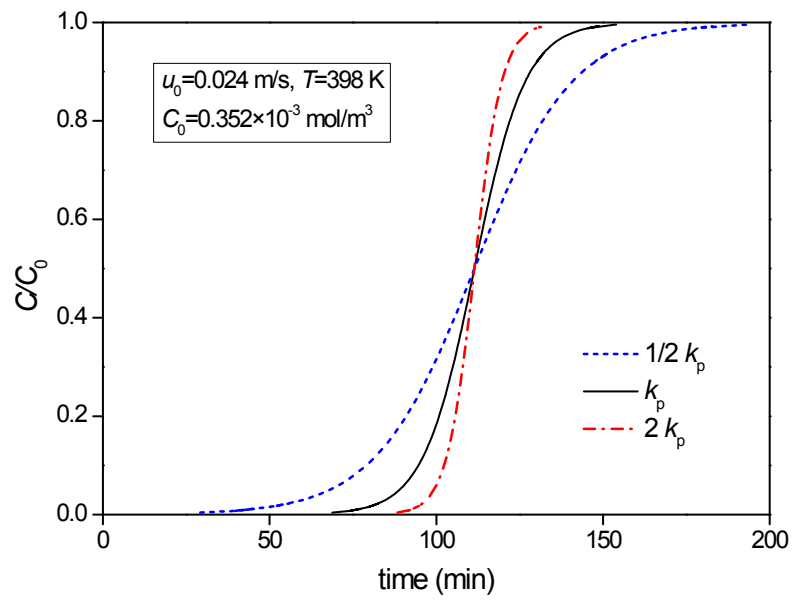

**Fig. S2.** Sensitivity of predicted breakthrough curves to  $k_p$  for naphthalene in SBA-15 packed beds.

#### S4. Comparisons of the internal mass-transfer from previous studies

The internal mass-transfer coefficients for the current adsorption of naphthalene on mesoporous adsorbents are compared with those for smaller VOCs on traditional adsorbents. The results are listed in Table S4.

**Table S4.** Comparison of internal mass-transfer coefficient ( $k_p$ ) between the present results and literature data.

| Studies        | Samples     |                                 | $C_0$<br>(mol/m <sup>3</sup> ) | $u_0$<br>(m/s) | $k_p$<br>(s <sup>-1</sup> ) |
|----------------|-------------|---------------------------------|--------------------------------|----------------|-----------------------------|
|                | Adsorbate   | Adsorbent                       |                                |                |                             |
| present        | naphthalene | MCM-41                          |                                |                | $7.51 \times 10^{-3}$       |
|                |             | SBA-15                          | $2.76 \times 10^{-3}$          | 0.024          | $9.95 \times 10^{-3}$       |
|                |             | CMK-3                           |                                |                | $7.90 \times 10^{-3}$       |
| A <sup>1</sup> | toluene     | activated carbon<br>fiber (ACF) | $3.04 \times 10^{-3}$          | 0.06           | $2.54 \times 10^{-5}$       |
| B <sup>2</sup> | toluene     | non-woven ACF                   | $22.9 \times 10^{-3}$          | 0.37           | $4.69 \times 10^{-5}$       |
|                | acetone     |                                 | $6.00 \times 10^{-3}$          |                | $2.42 \times 10^{-4}$       |
| C <sup>3</sup> | heptane     | zeolite                         | $6.00 \times 10^{-3}$          | 0.29           | $2.71 \times 10^{-4}$       |
|                | octane      |                                 | $10.0 \times 10^{-3}$          |                | $1.99 \times 10^{-4}$       |

#### References

1. X. Zhang, S. Chen and H. T. Bi, *Carbon*, 2010, **48**, 2317-2326.
2. C. Lorimier, A. Subrenat, L. Le Coq and P. Le Cloirec, *Environ. Technol.* 2005, **426**, 1217-1230.
3. S. Brosillon, M. H. Manero and J. N. Foussard, *Environ. Sci. Technol.*, 2001, **35**, 3571-3575.
